# Supplementary material for: Sustainability-Based Analysis of Conventional to High-Speed Machining of Al 6061-T6 Alloy
Source: MDPI journal article supplement (doi:10.3390/app11199032), 2021-09-28
Supplement: s1 [file s1]

### Experimental Data Detailed

**Table S1: CSM Experimental Data (Detailed)**

| Sr. NO | v   | f   | d | Trial 1 | Trial 2 | Trial 3 | Ave<br>SCE | Std<br>Dev | Trial<br>1 | Trial 2 | Trial 3 | Ave SR | Std<br>Dev |
|--------|-----|-----|---|---------|---------|---------|------------|------------|------------|---------|---------|--------|------------|
| 1      | 125 | 0.1 | 1 | 0.82    | 0.81    | 0.82    | 0.82       | 0.005      | 0.88       | 0.93    | 0.9     | 0.90   | 0.02       |
| 2      | 125 | 0.2 | 2 | 0.79    | 0.8     | 0.79    | 0.79       | 0.005      | 1.93       | 1.88    | 1.92    | 1.91   | 0.02       |
| 3      | 125 | 0.3 | 3 | 0.65    | 0.64    | 0.65    | 0.65       | 0.005      | 3.21       | 3.36    | 3.29    | 3.29   | 0.06       |
| 4      | 125 | 0.4 | 4 | 0.57    | 0.56    | 0.57    | 0.57       | 0.005      | 4.05       | 4.1     | 4.08    | 4.08   | 0.02       |
| 5      | 250 | 0.1 | 2 | 0.83    | 0.76    | 0.82    | 0.80       | 0.031      | 1.36       | 1.37    | 1.35    | 1.36   | 0.01       |
| 6      | 250 | 0.2 | 1 | 0.71    | 0.72    | 0.7     | 0.71       | 0.008      | 0.66       | 0.7     | 0.67    | 0.68   | 0.02       |
| 7      | 250 | 0.3 | 4 | 0.58    | 0.59    | 0.6     | 0.59       | 0.008      | 3.31       | 3.4     | 3.3     | 3.34   | 0.04       |
| 8      | 250 | 0.4 | 3 | 0.55    | 0.56    | 0.54    | 0.55       | 0.008      | 4.24       | 4.27    | 4.23    | 4.25   | 0.02       |
| 9      | 375 | 0.1 | 3 | 0.75    | 0.76    | 0.77    | 0.76       | 0.008      | 1          | 1.02    | 1       | 1.01   | 0.01       |
| 10     | 375 | 0.2 | 4 | 0.61    | 0.62    | 0.58    | 0.60       | 0.017      | 2.67       | 2.32    | 2.48    | 2.49   | 0.14       |
| 11     | 375 | 0.3 | 1 | 0.65    | 0.64    | 0.63    | 0.64       | 0.008      | 3.17       | 2.9     | 3.02    | 3.03   | 0.11       |
| 12     | 375 | 0.4 | 2 | 0.53    | 0.54    | 0.55    | 0.54       | 0.008      | 3.34       | 3.84    | 3.58    | 3.59   | 0.20       |
| 13     | 500 | 0.1 | 4 | 0.71    | 0.7     | 0.72    | 0.71       | 0.008      | 1.5        | 1.6     | 1.56    | 1.55   | 0.04       |
| 14     | 500 | 0.2 | 3 | 0.66    | 0.6     | 0.61    | 0.62       | 0.026      | 2.18       | 3.66    | 2.93    | 2.92   | 0.60       |
| 15     | 500 | 0.3 | 2 | 0.63    | 0.62    | 0.61    | 0.62       | 0.008      | 2.69       | 2.77    | 2.74    | 2.73   | 0.03       |
| 16     | 500 | 0.4 | 1 | 0.6     | 0.59    | 0.58    | 0.59       | 0.008      | 3.3        | 3.4     | 3.36    | 3.35   | 0.04       |

**Table S2: TSM Experimental Data (Detailed)**

| Sr. NO | v    | f   | d | Trial 1 | Trial 2 | Trial 3 | Ave<br>SCE | Std<br>Dev | Trial<br>1 | Trial 2 | Trial 3 | Ave SR | Std<br>Dev |
|--------|------|-----|---|---------|---------|---------|------------|------------|------------|---------|---------|--------|------------|
| 1      | 750  | 0.1 | 1 | 0.76    | 0.75    | 0.77    | 0.76       | 0.008      | 2.53       | 2.6     | 2.5     | 2.54   | 0.04       |
| 2      | 750  | 0.2 | 2 | 0.64    | 0.62    | 0.63    | 0.63       | 0.008      | 1.76       | 2.45    | 1.59    | 1.93   | 0.37       |
| 3      | 750  | 0.3 | 3 | 0.6     | 0.6     | 0.59    | 0.60       | 0.005      | 3.12       | 3.22    | 3.17    | 3.17   | 0.04       |
| 4      | 750  | 0.4 | 4 | 0.52    | 0.53    | 0.54    | 0.53       | 0.008      | 5.03       | 5.15    | 5.1     | 5.09   | 0.05       |
| 5      | 1000 | 0.1 | 2 | 0.74    | 0.7     | 0.73    | 0.72       | 0.017      | 1.34       | 1.37    | 1.36    | 1.36   | 0.01       |
| 6      | 1000 | 0.2 | 1 | 0.66    | 0.65    | 0.67    | 0.66       | 0.008      | 1.94       | 2.1     | 2.07    | 2.04   | 0.07       |
| 7      | 1000 | 0.3 | 4 | 0.55    | 0.55    | 0.54    | 0.55       | 0.005      | 3.64       | 4.12    | 3.9     | 3.89   | 0.20       |
| 8      | 1000 | 0.4 | 3 | 0.57    | 0.59    | 0.58    | 0.58       | 0.008      | 3.15       | 4.13    | 3.14    | 3.47   | 0.46       |
| 9      | 1250 | 0.1 | 3 | 0.72    | 0.74    | 0.73    | 0.73       | 0.008      | 1.22       | 0.61    | 1.23    | 1.02   | 0.29       |
| 10     | 1250 | 0.2 | 4 | 0.52    | 0.52    | 0.51    | 0.52       | 0.005      | 3.91       | 4       | 4.03    | 3.98   | 0.05       |
| 11     | 1250 | 0.3 | 1 | 0.65    | 0.64    | 0.65    | 0.65       | 0.005      | 5.56       | 4.71    | 5.25    | 5.17   | 0.35       |
| 12     | 1250 | 0.4 | 2 | 0.58    | 0.58    | 0.57    | 0.58       | 0.005      | 4.15       | 4.49    | 3.71    | 4.12   | 0.32       |
| 13     | 1500 | 0.1 | 4 | 0.71    | 0.69    | 0.7     | 0.70       | 0.008      | 2.91       | 3       | 2.88    | 2.93   | 0.05       |
| 14     | 1500 | 0.2 | 3 | 0.55    | 0.55    | 0.54    | 0.55       | 0.005      | 3.15       | 2.75    | 3.14    | 3.01   | 0.19       |
| 15     | 1500 | 0.3 | 2 | 0.56    | 0.55    | 0.56    | 0.56       | 0.005      | 4.09       | 4.88    | 4.25    | 4.41   | 0.34       |
| 16     | 1500 | 0.4 | 1 | 0.56    | 0.56    | 0.55    | 0.56       | 0.005      | 6.71       | 6.58    | 6.83    | 6.71   | 0.10       |

**Table S3: HSM Experimental Data (Detailed)**

| Sr. NO | v    | f   | d | Trial 1 | Trial 2 | Trial 3 | Ave SCE | Std Dev | Trial 1 | Trial 2 | Trial 3 | Ave SR | Std Dev |
|--------|------|-----|---|---------|---------|---------|---------|---------|---------|---------|---------|--------|---------|
| 1      | 1750 | 0.1 | 1 | 0.75    | 0.75    | 0.74    | 0.75    | 0.005   | 1.85    | 2.14    | 1.99    | 1.99   | 0.12    |
| 2      | 1750 | 0.2 | 2 | 0.62    | 0.62    | 0.61    | 0.62    | 0.005   | 2.81    | 2.91    | 2.86    | 2.86   | 0.04    |
| 3      | 1750 | 0.3 | 3 | 0.62    | 0.61    | 0.62    | 0.62    | 0.005   | 5.31    | 5.12    | 5.2175  | 5.22   | 0.08    |
| 4      | 1750 | 0.4 | 4 | 0.36    | 0.37    | 0.37    | 0.37    | 0.005   | 6.73    | 9.05    | 7.89    | 7.89   | 0.95    |
| 5      | 2000 | 0.1 | 2 | 0.75    | 0.76    | 0.75    | 0.75    | 0.005   | 1.97    | 2.03    | 2       | 2.00   | 0.02    |
| 6      | 2000 | 0.2 | 1 | 0.66    | 0.66    | 0.65    | 0.66    | 0.005   | 2.68    | 3.25    | 2.96    | 2.96   | 0.23    |
| 7      | 2000 | 0.3 | 4 | 0.43    | 0.43    | 0.42    | 0.43    | 0.005   | 5.1     | 5.28    | 5.19    | 5.19   | 0.07    |
| 8      | 2000 | 0.4 | 3 | 0.43    | 0.43    | 0.42    | 0.43    | 0.005   | 6.98    | 7.23    | 7.1     | 7.10   | 0.10    |
| 9      | 2250 | 0.1 | 3 | 0.74    | 0.77    | 0.75    | 0.75    | 0.012   | 1.62    | 1.61    | 1.61    | 1.61   | 0.00    |
| 10     | 2250 | 0.2 | 4 | 0.56    | 0.57    | 0.56    | 0.56    | 0.005   | 3.26    | 2.59    | 2.93    | 2.93   | 0.27    |
| 11     | 2250 | 0.3 | 1 | 0.59    | 0.62    | 0.61    | 0.61    | 0.012   | 4       | 3.06    | 3.53    | 3.53   | 0.38    |
| 12     | 2250 | 0.4 | 2 | 0.56    | 0.56    | 0.55    | 0.56    | 0.005   | 7.65    | 7.42    | 7.53    | 7.53   | 0.09    |
| 13     | 2500 | 0.1 | 4 | 0.77    | 0.78    | 0.78    | 0.78    | 0.005   | 1.68    | 2.38    | 2.03    | 2.03   | 0.29    |
| 14     | 2500 | 0.2 | 3 | 0.68    | 0.66    | 0.67    | 0.67    | 0.008   | 2.23    | 2.34    | 2.28    | 2.28   | 0.04    |
| 15     | 2500 | 0.3 | 2 | 0.69    | 0.68    | 0.69    | 0.69    | 0.005   | 4.56    | 4.86    | 4.71    | 4.71   | 0.12    |
| 16     | 2500 | 0.4 | 1 | 0.6     | 0.63    | 0.61    | 0.61    | 0.012   | 6.18    | 5.92    | 6.05    | 6.05   | 0.11    |
